# Supplementary material
Source: publisher figshare collection journal article supplement (https://acs.figshare.com/ndownloader/files/4154719)
Supplement: Supplementary file 1 [file 4154719]

## Supporting Information

### Effect of Water Structure on Gelation of Agar in Glycerol Solutions and Phase Diagram of Agar Organogels

Shilpi Boral and H.B. Bohidar\*

Polymer and Biophysics Laboratory, School of Physical Sciences

Jawaharlal Nehru University, New Delhi-110 067, India.

#### 1. Raman plots:

Deconvolution of Raman spectra obtained from 10% glycerol solution, 0.02% agar in 10% glycerol solution (sol phase) and 0.3% agar in 10% glycerol (gel phase) are shown in Fig. S1. In every spectrum, the frequency band from 3050 to 3600  $\text{cm}^{-1}$  was fitted to three-peak Lorentzian function that resolved the O-H stretching peaks located at 3200  $\text{cm}^{-1}$ , 3310  $\text{cm}^{-1}$  and 3460  $\text{cm}^{-1}$ . These peaks represent the ice-like water structure (fully structured), liquid-like water structure (partially structured) and amorphous water structure (free water) respectively. The spectral analysis was robust that made us believe that the peaks in question were resolvable through sufficient statistical accuracy ( $\chi^2 > 0.97$ ) as can be seen from Fig. S1.

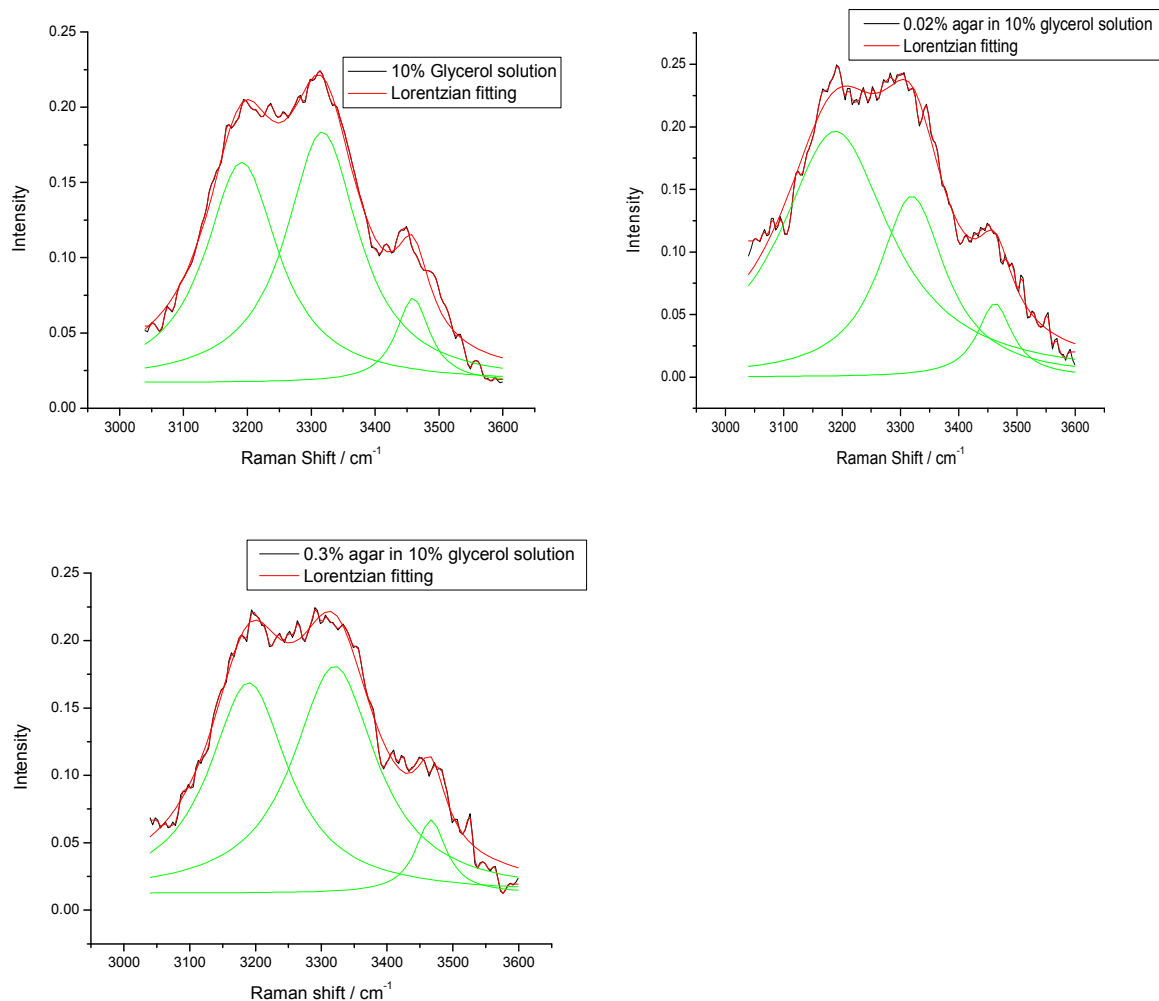

Figure S1: Raman spectra of glycerol solution, agar organosol and agar organogel recorded at room temperature and their Lorentzian three-component deconvolution.

## 2. Hydrogen Bond model

We propose a hydration model and hypothesize that the specific hydration of oxygen atoms by available hydrogen atoms in the system dictates the area of various Raman bands. In this model, the total number of H-atoms,  $H_T$  means the sum of all the H-atoms attached to O-atoms of both water and glycerol molecules ( $H_T = H_W + H_G$ ). But the H-atoms attached to C-atoms in glycerol are excluded while calculating  $H_G$ . In the systems where agar was added, the H-atoms ( $H_A$  of agar) were used for calculation which are

found in  $\text{-OH}$  groups. In case of agar organo solutions and gels, the number of  $\text{H}_\text{A}$  was negligible in comparison to  $\text{H}_\text{G}$  and  $\text{H}_\text{W}$  values. Specifically, when the O-atom (irrespective of whether it belongs to water molecule or glycerol molecule) has all the 4 bonds (including the covalent and H-bonds) engaged with 4 H-atoms, we describe it as fully structured, when 3 bonds are engaged with 3 different H-atoms, it is partially structured and when only 2 bonds are engaged with 2 H-atoms, we refer to it as free water molecule. Thus the ice-like structure can only be contributed if the O-atom belongs to water molecule. Suppose the O-atom belongs to glycerol molecule, it contributes to liquid-like or free water depending on the number of H-atoms attached to it through covalent and H-bond. Figure S2 describes the concept of our proposed Hydrogen bond model.

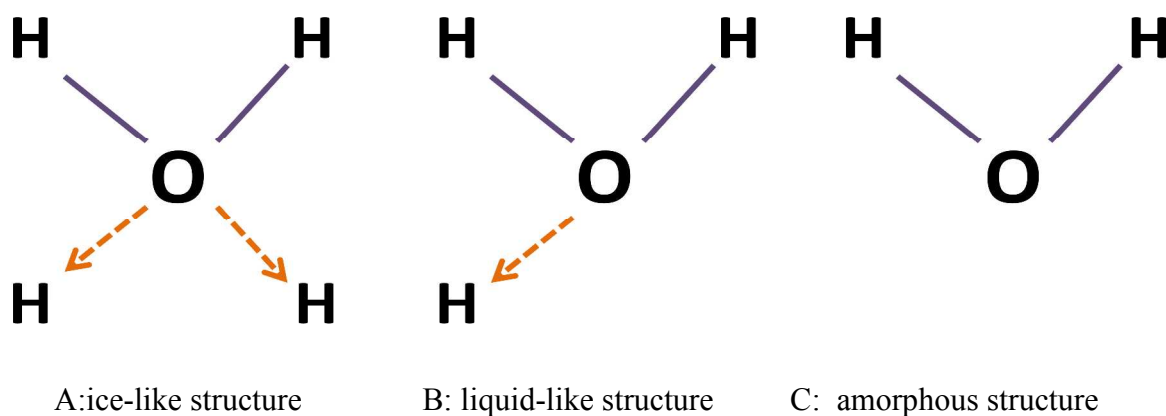

Figure S2. Differentiation between Oxygen-hydrogen bonding where O represents  $\text{O}_\text{W}$  and the H-bonds can be formed with either  $\text{H}_\text{W}$  or  $\text{H}_\text{G}$  atoms. A, B and C will contribute to different water structures. Similar conjugation of  $\text{O}_\text{G}$  atoms with  $\text{H}_\text{W}$  or  $\text{H}_\text{G}$  atoms is possible.

The approach adopted to estimate hydrogen bond active atoms was quite simple. The number of individual hydrogen bond active H and O atoms in the solvents was determined from their concentration. It was assumed that all these atoms form hydrogen bonds ignoring any steric restriction. Number of atoms in a given liquid of molecular weight,  $M$  and density,  $\rho$ , having

volume  $v$  is,  $n = (\rho v/M)N_A$ ,  $N_A$  being the Avogadro number. If this liquid is water, we have  $2n$  number of H-atoms balanced by  $n$  number of O-atoms. For glycerol, we have  $3n$  number of H-atoms balanced by  $3n$  number of O-atoms. All these are H-bond active atoms.

### 3. Hydrodynamic Radius

The agar sols of 0.02% (w/v) in the binary solvent of water-glycerol mixture were projected to light scattering experiments and the effective hydrodynamic radius was calculated for various glycerol concentration in the solution. Figure S3 depicts the increase in  $R_h$  with increase in glycerol concentration.

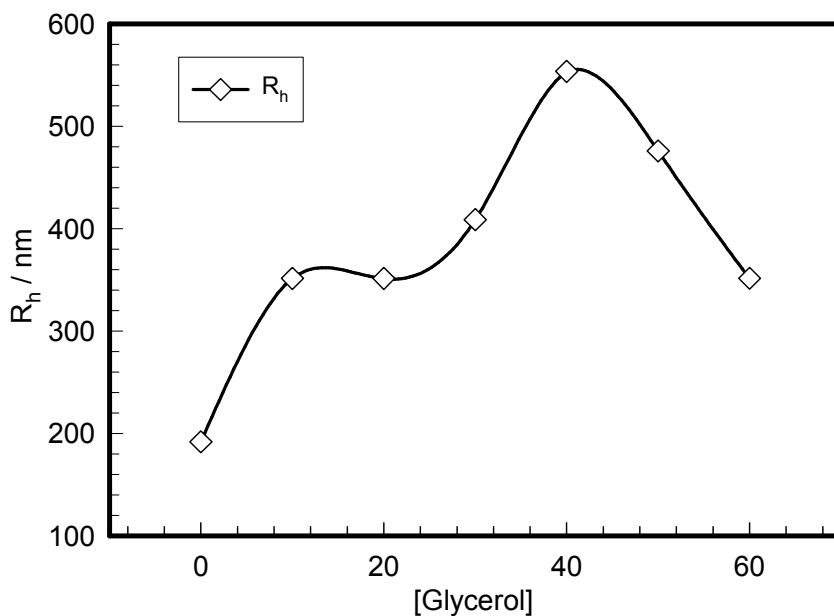

Figure S3: Plot of hydrodynamic radius with glycerol concentration. its clear from the plot that the size of agar particles increases almost 3 times with increase of glycerol concentration from 0% to 40% (v/v).
